# Supplementary material
Source: PubMed Central journal article supplement (PMC3416454)
Supplement: supp_80.7.2473_IAI-IAI00211-12-s01.pdf [file supp_80.7.2473_IAI-IAI00211-12-s01.pdf]

## Supplemental Figure 1

### Alignment of Native and Codon-Harmonized PfMSP8 (FVO) Gene Sequences

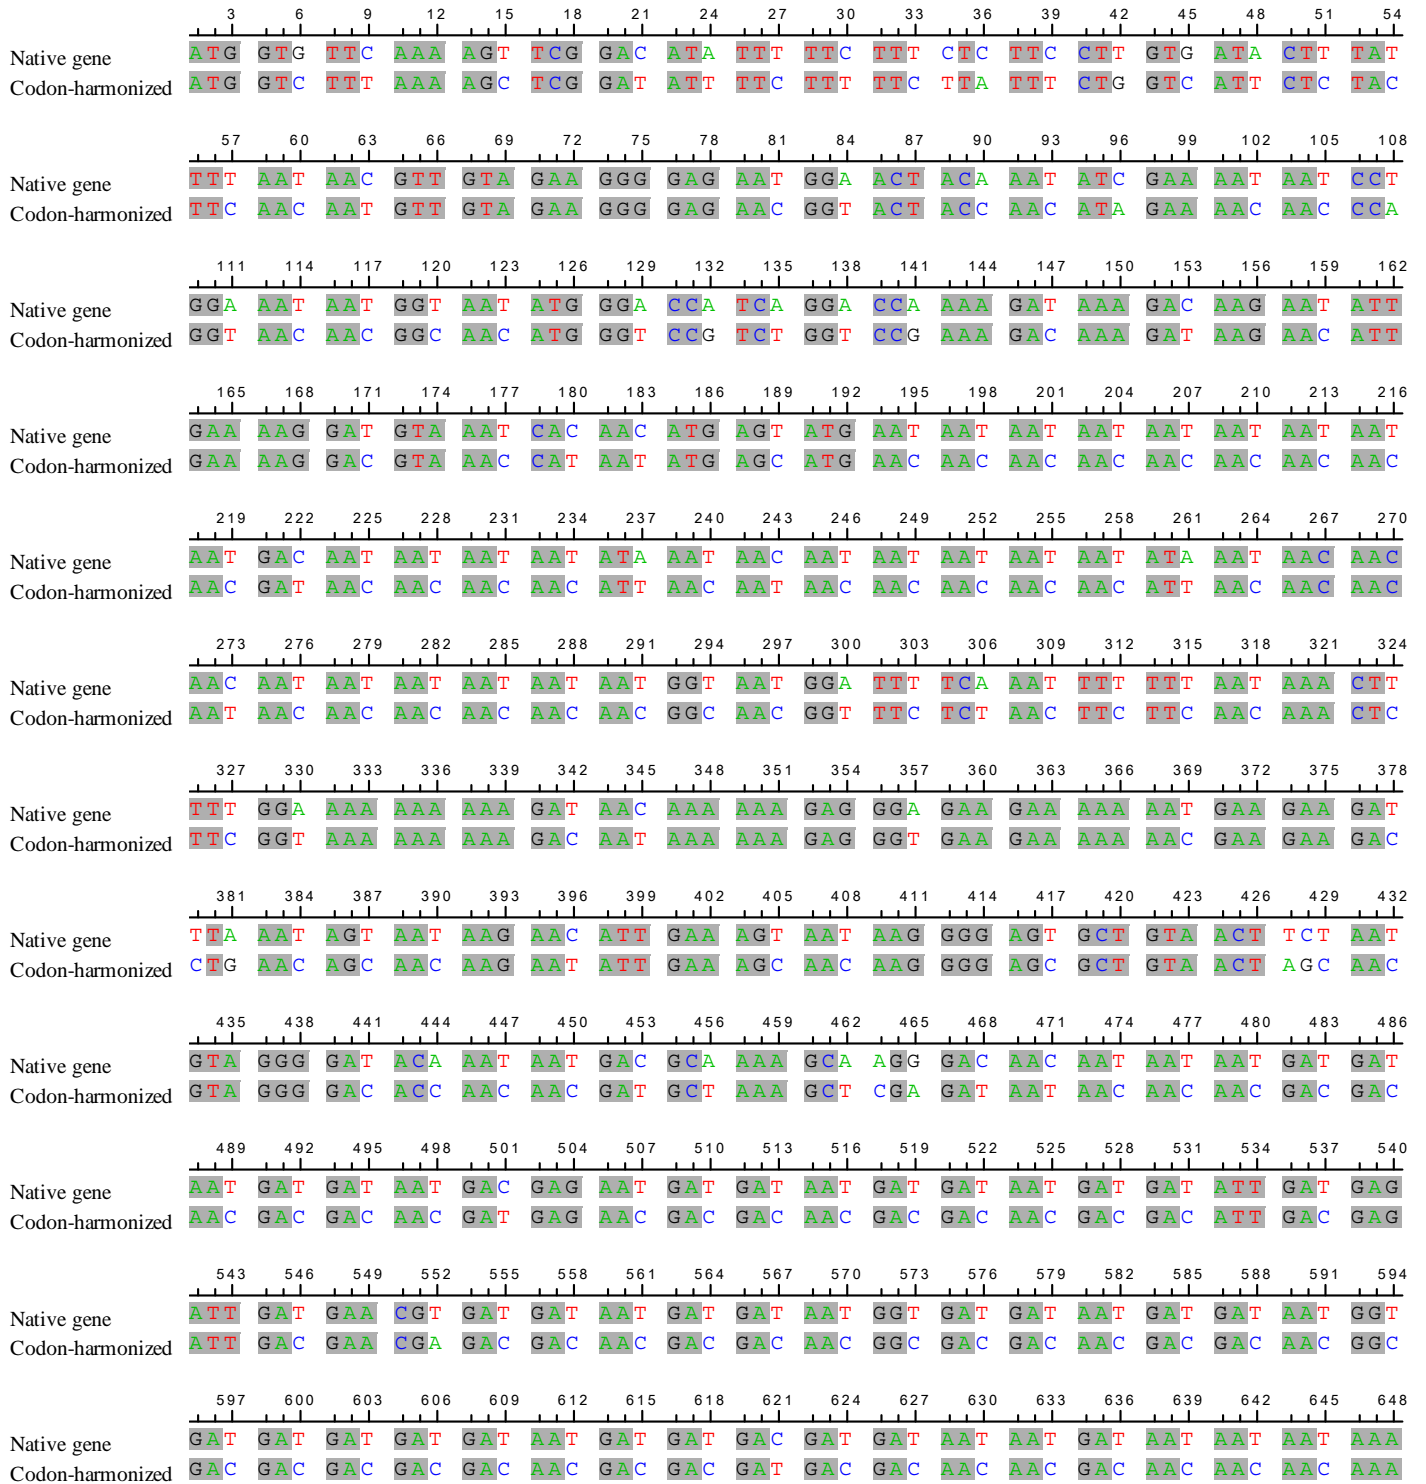

|                  |       |       |       |       |       |       |       |       |       |       |       |       |       |       |       |       |       |       |     |     |     |     |     |     |   |
|------------------|-------|-------|-------|-------|-------|-------|-------|-------|-------|-------|-------|-------|-------|-------|-------|-------|-------|-------|-----|-----|-----|-----|-----|-----|---|
|                  | 651   | 654   | 657   | 660   | 663   | 666   | 669   | 672   | 675   | 678   | 681   | 684   | 687   | 690   | 693   | 696   | 699   | 702   |     |     |     |     |     |     |   |
| Native gene      | AA    | T     | AA    | T     | AG    | T     | AA    | T     | AA    | T     | TT    | A     | AC    | G     | AAA   | AA    | G     | GAA   | GGG | GAG | AAA | ATT | GAT | TTA |   |
| Codon-harmonized | AA    | C     | AA    | C     | AG    | C     | AA    | C     | AA    | C     | CT    | G     | AC    | G     | AAA   | AA    | G     | GAA   | GGG | GAG | AAA | ATT | GAC | CTG |   |
|                  | 705   | 708   | 711   | 714   | 717   | 720   | 723   | 726   | 729   | 732   | 735   | 738   | 741   | 744   | 747   | 750   | 753   | 756   |     |     |     |     |     |     |   |
| Native gene      | GG    | A     | GTT   | CAA   | AA    | T     | AAA   | AAA   | CAA   | AA    | T     | ATT   | TTT   | TCA   | ACC   | AA    | C     | AA    | T   | AAA | GG  | A   | TTA | AA  | T |
| Codon-harmonized | GG    | T     | GTT   | CAG   | AA    | C     | AAA   | AAA   | CAG   | AA    | C     | ATT   | TTT   | TCT   | ACT   | AA    | T     | AA    | C   | AAA | GG  | T   | CTG | AA  | C |
|                  | 759   | 762   | 765   | 768   | 771   | 774   | 777   | 780   | 783   | 786   | 789   | 792   | 795   | 798   | 801   | 804   | 807   | 810   |     |     |     |     |     |     |   |
| Native gene      | AAA   | TAT   | AA    | T     | ATA   | GAT   | AA    | T     | GAA   | TTA   | AAA   | GAA   | GTA   | GAT   | GCA   | CTT   | TTG   | AAA   | AA  | T   | GAT |     |     |     |   |
| Codon-harmonized | AAA   | TAC   | AA    | C     | ATT   | GAC   | AA    | C     | GAA   | CTG   | AAA   | GAA   | GTA   | GAC   | GCT   | CTG   | CTC   | AAA   | AA  | C   | GAC |     |     |     |   |
|                  | 813   | 816   | 819   | 822   | 825   | 828   | 831   | 834   | 837   | 840   | 843   | 846   | 849   | 852   | 855   | 858   | 861   | 864   |     |     |     |     |     |     |   |
| Native gene      | AA    | T     | TAT   | ATT   | TTA   | AA    | C     | AAA   | TAC   | CAT   | GTT   | TCA   | TTT   | TTT   | AA    | T     | AA    | T     | TTT | GAA | GAA | GAT |     |     |   |
| Codon-harmonized | AA    | C     | TAC   | ATT   | CTG   | AA    | T     | AAA   | TAT   | CAC   | GTT   | TCT   | TTT   | TTT   | AA    | C     | AA    | C     | TTT | GAA | GAA | GAC |     |     |   |
|                  | 867   | 870   | 873   | 876   | 879   | 882   | 885   | 888   | 891   | 894   | 897   | 900   | 903   | 906   | 909   | 912   | 915   | 918   |     |     |     |     |     |     |   |
| Native gene      | ACA   | TAT   | AA    | T     | AA    | G     | AA    | G     | AAA   | TTT   | ATA   | AGA   | CCG   | TAT   | GAT   | CTT   | AGC   | TTG   | TTA | AAA | AGT |     |     |     |   |
| Codon-harmonized | ACC   | TAC   | AA    | C     | AA    | G     | AA    | G     | AAA   | TTT   | ATT   | CGT   | CCC   | TAC   | GAC   | CTG   | AGC   | CTC   | CTG | AAA | AGC |     |     |     |   |
|                  | 921   | 924   | 927   | 930   | 933   | 936   | 939   | 942   | 945   | 948   | 951   | 954   | 957   | 960   | 963   | 966   | 969   | 972   |     |     |     |     |     |     |   |
| Native gene      | ATA   | TTA   | ATA   | TAT   | AGA   | CAA   | AGA   | GTA   | ACA   | AGA   | AA    | T     | TGT   | GTT   | AA    | T     | GTT   | TTT   | CAA | GAT |     |     |     |     |   |
| Codon-harmonized | ATT   | CTG   | ATT   | TAC   | CGT   | CAG   | CGT   | GTA   | ACC   | CGT   | AA    | C     | TGC   | GTT   | AA    | C     | GTT   | TTT   | CAG | GAC |     |     |     |     |   |
|                  | 975   | 978   | 981   | 984   | 987   | 990   | 993   | 996   | 999   | 1,002 | 1,005 | 1,008 | 1,011 | 1,014 | 1,017 | 1,020 | 1,023 | 1,026 |     |     |     |     |     |     |   |
| Native gene      | CTC   | AA    | T     | GCT   | GTT   | TTT   | GG    | T     | AAA   | TGT   | TAT   | AA    | T     | AAA   | GAT   | GAC   | ACT   | AAA   | TTA | AGT | ATT |     |     |     |   |
| Codon-harmonized | TTA   | AA    | C     | GCT   | GTT   | TTT   | GG    | C     | AAA   | TGC   | TAC   | AA    | C     | AAA   | GAC   | GAT   | ACT   | AAA   | CTG | AGC | ATT |     |     |     |   |
|                  | 1,029 | 1,032 | 1,035 | 1,038 | 1,041 | 1,044 | 1,047 | 1,050 | 1,053 | 1,056 | 1,059 | 1,062 | 1,065 | 1,068 | 1,071 | 1,074 | 1,077 | 1,080 |     |     |     |     |     |     |   |
| Native gene      | ACT   | CG    | T     | GAT   | AAA   | GTT   | AAA   | AAA   | GAG   | TTA   | AGT   | AGG   | AAA   | AA    | T     | AGA   | AA    | T     | TTT | GTA | GAA |     |     |     |   |
| Codon-harmonized | ACT   | CGA   | GAC   | GAT   | AAA   | GTT   | AAA   | AAA   | GAG   | CTG   | AGC   | CGA   | AAA   | AA    | C     | CGT   | AA    | C     | TTT | GTA | GAA |     |     |     |   |
|                  | 1,083 | 1,086 | 1,089 | 1,092 | 1,095 | 1,098 | 1,101 | 1,104 | 1,107 | 1,110 | 1,113 | 1,116 | 1,119 | 1,122 | 1,125 | 1,128 | 1,131 | 1,134 |     |     |     |     |     |     |   |
| Native gene      | TAC   | TTA   | ATT   | GAA   | ATG   | TTA   | GAA   | AA    | T     | ACC   | CTT   | AA    | T     | AGT   | ATG   | AA    | T     | GAT   | GAT | TTT | ATT |     |     |     |   |
| Codon-harmonized | TAT   | CTG   | ATT   | GAA   | ATG   | CTG   | GAA   | AA    | C     | ACG   | CTC   | AA    | C     | AGC   | ATG   | AA    | C     | GAC   | GAC | TTT | ATT |     |     |     |   |
|                  | 1,137 | 1,140 | 1,143 | 1,146 | 1,149 | 1,152 | 1,155 | 1,158 | 1,161 | 1,164 | 1,167 | 1,170 | 1,173 | 1,176 | 1,179 | 1,182 | 1,185 | 1,188 |     |     |     |     |     |     |   |
| Native gene      | AA    | T     | AAA   | GAT   | AA    | T     | TTT   | GAT   | TTA   | AA    | T     | AA    | T     | TAT   | GTT   | AAA   | GAA   | TTT   | GAA | TTA | ATA | AA  | T   |     |   |
| Codon-harmonized | AA    | C     | AAA   | GAC   | AA    | C     | TTT   | GAC   | CTG   | AA    | C     | AA    | C     | TAC   | GTT   | AAA   | GAA   | TTT   | GAA | CTG | ATT | AA  | C   |     |   |
|                  | 1,191 | 1,194 | 1,197 | 1,200 | 1,203 | 1,206 | 1,209 | 1,212 | 1,215 | 1,218 | 1,221 | 1,224 | 1,227 | 1,230 | 1,233 | 1,236 | 1,239 | 1,242 |     |     |     |     |     |     |   |
| Native gene      | TAT   | TTA   | TTA   | ATA   | CAT   | GAA   | GAT   | TCA   | GAT   | ATA   | TTT   | TTA   | GAA   | ACA   | TAT   | AA    | T     | TTA   | ATA |     |     |     |     |     |   |
| Codon-harmonized | TAC   | CTG   | CTG   | ATT   | CAC   | GAA   | GAC   | TCT   | GAC   | ATT   | TTT   | CTG   | GAA   | ACC   | TAC   | AA    | C     | CTG   | ATT |     |     |     |     |     |   |
|                  | 1,245 | 1,248 | 1,251 | 1,254 | 1,257 | 1,260 | 1,263 | 1,266 | 1,269 | 1,272 | 1,275 | 1,278 | 1,281 | 1,284 | 1,287 | 1,290 | 1,293 | 1,296 |     |     |     |     |     |     |   |
| Native gene      | AG    | T     | GG    | A     | TTA   | AA    | T     | TCA   | AA    | C     | ATA   | GAA   | GAA   | ACA   | TCT   | ATT   | GAA   | AA    | G   | CTT | AAA | TAT | GCA |     |   |
| Codon-harmonized | AG    | C     | GG    | T     | CTG   | AA    | C     | TCT   | AA    | T     | ATT   | GAA   | GAA   | ACC   | AGC   | ATT   | GAA   | AA    | G   | CTC | AAA | TAC | GCT |     |   |

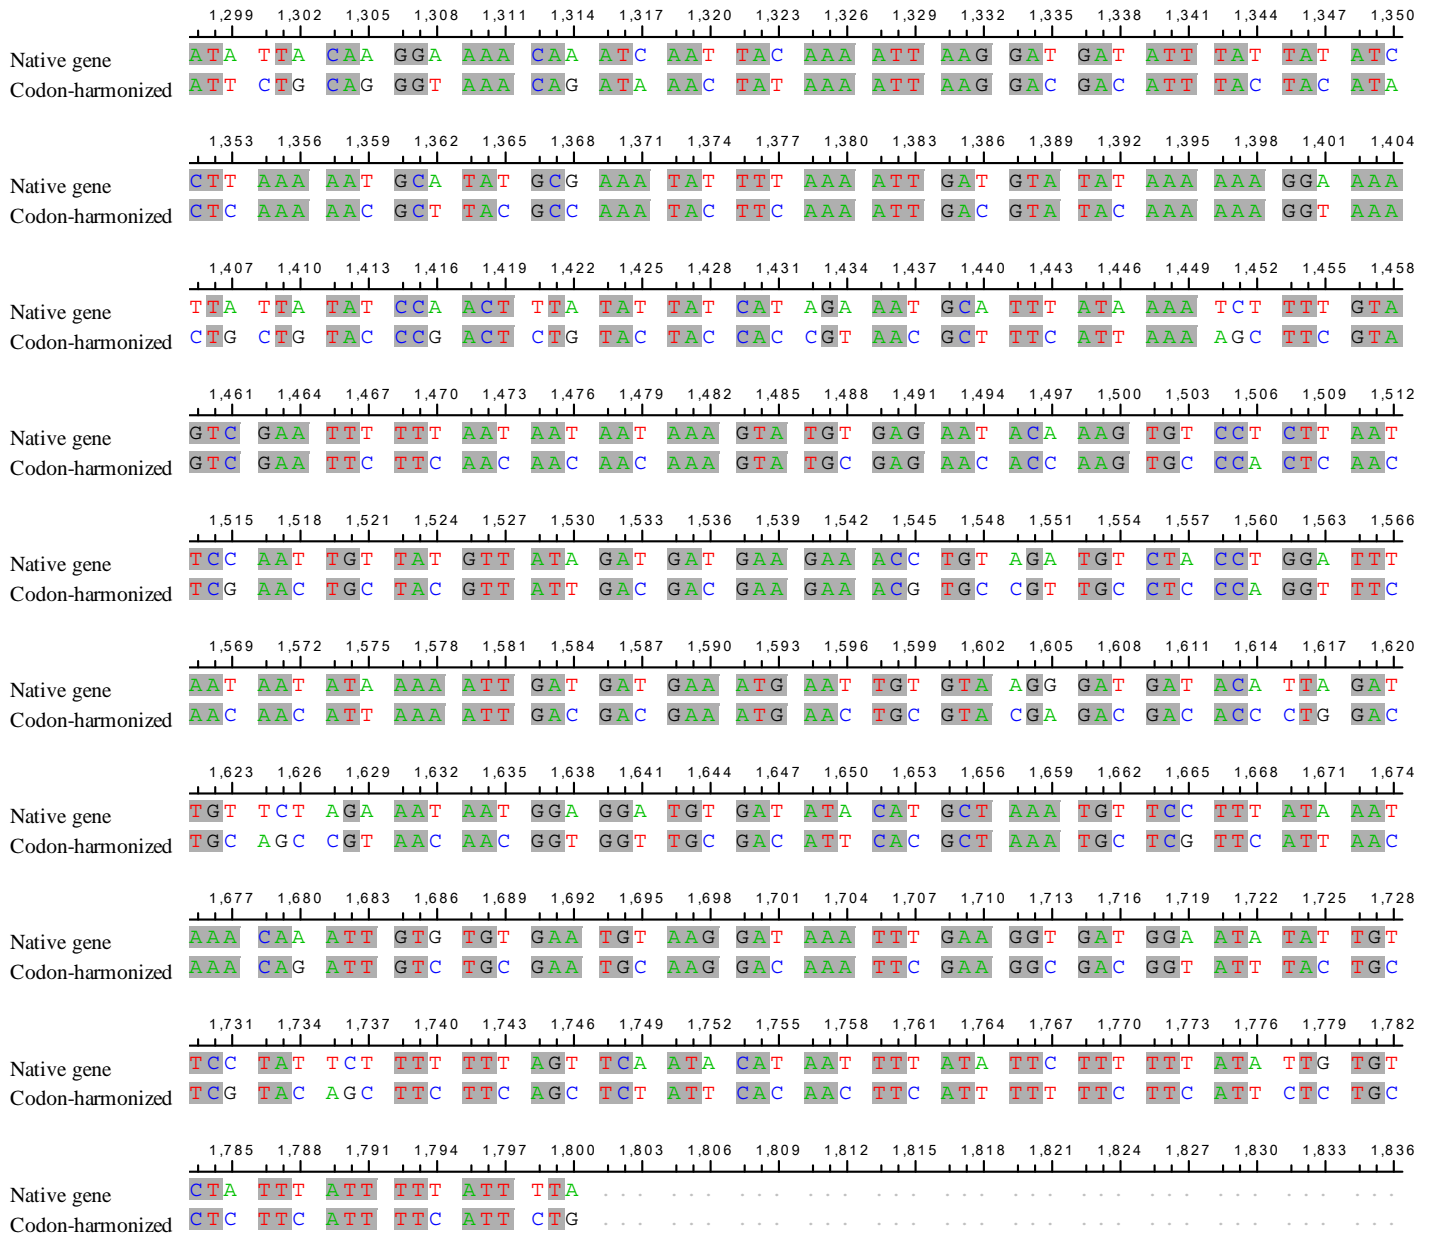

**Supplemental Figure 1. Codon-harmonized *PfMSP8* gene sequence.** Shown are the coding sequences of the native *P. falciparum* MSP8 (FVO) gene and the codon-harmonized synthetic gene used for the recombinant expression of *PfMSP8* in *E. coli*. Identical bases are shaded in gray.

**Supplemental Table 1**  
**18-mer overlapping peptides of *Pf*MSP8**

| Peptide Number | Peptide Sequence    | Peptide Location in Full-Length <i>Pf</i> MSP8 (FVO) |
|----------------|---------------------|------------------------------------------------------|
| 1              | NGTTNIENNP GNNNGMGP | 27-44                                                |
| 2              | PGNNGMGP SGPKDKDN   | 36-53                                                |
| 3              | SGPKDKDKNIEKDVHNHM  | 45-62                                                |
| 4              | IEKDVHNHMSMNNNNNNN  | 54-71                                                |
| 5              | SMNNNNNNNNNDNNNNIN  | 63-80                                                |
| 6              | NNDNNNNINNNNNNNINN  | 72-89                                                |
| 7              | NNNNNNINNNNNNNNNNG  | 81-98                                                |
| 8              | NNNNNNNGNGFSNFFNK   | 90-107                                               |
| 9              | NGFSNFFNKLFGKKKDNK  | 99-116                                               |
| 10             | LFGKKKDNKKEGEEKNEE  | 108-125                                              |
| 11             | KEGEEKNEEDLNSKNIE   | 117-134                                              |
| 12             | DLNSKNIESNKGSAVTS   | 126-143                                              |
| 13             | SNKGSAVTSNVGDTNDA   | 135-152                                              |
| 14             | NVGDTNNDAKARDNNND   | 144-161                                              |
| 15             | KARDNNNDNDNDNDEND   | 153-170                                              |
| 16             | DNDDNDENDNDNDNDID   | 162-179                                              |
| 17             | DNDDNDIDEIDERDDND   | 171-188                                              |
| 18             | EIDERDDNDNGDDNDN    | 180-197                                              |
| 19             | DNGDDNDNGDDDDND     | 189-206                                              |
| 20             | GDDDDNDDDDDNDNNN    | 198-215                                              |
| 21             | DDNDNDNNKNSNNTD     | 207-224                                              |
| 22             | KNNSNNTDTKKEGEKID   | 216-233                                              |
| 23             | TKKEGEKIDLG VQNKQN  | 225-242                                              |
| 24             | LG VQNKQNIFSTNNKGL  | 234-251                                              |
| 25             | IFSTNNKGLNKYNIDNEL  | 243-260                                              |
| 26             | NKYNIDNELKEVDALLKN  | 252-269                                              |
| 27             | KEVDALLKNDNYILNKYH  | 261-278                                              |
| 28             | DNYILNKYHVSFFNFFEE  | 270-287                                              |
| 29             | VVSFFNFEE DTYNKKKFI | 279-296                                              |
| 30             | DTYNKKKFI RPYDLSLLK | 288-305                                              |
| 31             | RPYDLSLLKSILYRQRV   | 297-314                                              |
| 32             | SILYRQRVTRNCVNVFQ   | 306-323                                              |
| 33             | TRNCVNVFQDLNAVFGKC  | 315-332                                              |
| 34             | DLNAVFGKCYNKDDTKLS  | 324-341                                              |
| 35             | YNKDDTKLSITRDKVKKE  | 333-350                                              |
| 36             | ITRDKVKKELSRKRNRFV  | 342-359                                              |
| 37             | LSRKRNRFVEYLIEMLEN  | 351-368                                              |
| 38             | EYLIEMLENTLNSMNDDF  | 360-377                                              |
| 39             | TLNSMNDDFINKDNFDLN  | 369-386                                              |
| 40             | INKDNFDLN NYVKEFELI | 378-395                                              |

|    |                    |         |
|----|--------------------|---------|
| 41 | NYVKEFELINYLLIHEDS | 378-404 |
| 42 | NYLLIHEDSDIFLETYNL | 396-413 |
| 43 | DIFLETYNLISGLNSNIE | 405-422 |
| 44 | ISGLNSNIEETSIEKLKY | 414-431 |
| 45 | ETSIEKLKYAILQGKQIN | 423-440 |
| 46 | AILQGKQINYKIKDDIYY | 432-449 |
| 46 | YKIKDDIYYILKNAYAKY | 441-458 |
| 48 | ILKNAYAKYFKIDVYKKG | 450-467 |
| 49 | FKIDVYKKGKLLYPTLYY | 459-476 |
| 50 | KLLYPTLYYHRNAFIKSF | 468-485 |
| 51 | HRNAFIKSFVVEFFNKNK | 477-494 |
| 52 | VVEFFNKNKVCENTKCPL | 486-503 |
| 53 | VCENTKCPLNSNCYVIDD | 495-512 |
| 54 | NSNCYVIDDEETCRCLPG | 504-521 |
| 55 | EETCRCLPGFNNIKIDDE | 513-530 |
| 56 | FNNIKIDDEMNCVRDDL  | 522-539 |
| 57 | MNCVRDDLDCSRNNGGC  | 531-548 |
| 58 | DCSRNNGGCDIHAKCSFI | 540-557 |
| 59 | DIHAKCSFINKQIVCECK | 549-566 |
| 60 | QIVCECKDKFEGDGIYCS | 560-577 |

Number, sequence and amino acid position of overlapping synthetic peptides of *Pf*MSP8 (FVO) used to map T cell epitopes recognized by mice immunized with *rPf*MSP8 or *rPf*MSP8 ( $\Delta$ Asn/Asp).
